# Supplementary material for: Fouling analysis and permeate quality evaluation of mulberry wine in microfiltration process
Source: Royal Society of Chemistry journal article supplement (doi:10.1039/c9ra09034g), 2020-01-01
Supplement: c9ra09034g1.pdf [file c9ra09034g1.pdf]

**Table S1** Concentration of volatiles in different mulberry wine samples

| Number                           | Name                                                | Concentration (means±standard deviation, µg/L) |                                   |                                  |                                 |                                 |
|----------------------------------|-----------------------------------------------------|------------------------------------------------|-----------------------------------|----------------------------------|---------------------------------|---------------------------------|
|                                  |                                                     | Natural clarification                          | PES0.22                           | PES0.45                          | PVDF0.22                        | PVDF0.45                        |
| <b>Alcohols (11)</b>             |                                                     |                                                |                                   |                                  |                                 |                                 |
| 1                                | 2-Methyl-1-propanol                                 | 13.52±0.64 <sup>b</sup>                        | 16.92±1.37 <sup>a</sup>           | 6.48±0.94 <sup>d</sup>           | 13.80±1.92 <sup>b</sup>         | 9.23±0.36 <sup>c</sup>          |
| 2                                | 3-Methyl-1-butanol                                  | 332.55±22.70 <sup>a</sup>                      | 235.08±24.65 <sup>b</sup>         | 144.77±33.58 <sup>c</sup>        | 135.20±3.62 <sup>c</sup>        | 243.54±4.18 <sup>a</sup>        |
| 3                                | 1-Heptanol                                          | 9.63±0.78 <sup>a</sup>                         | 6.91±0.74 <sup>b</sup>            | 4.34±0.90 <sup>c</sup>           | 4.11±0.06 <sup>c</sup>          | 6.86±0.14 <sup>a</sup>          |
| 4                                | Linalool                                            | 10.67±1.04 <sup>a</sup>                        | 8.76±0.60 <sup>a</sup>            | 5.72±1.02 <sup>b</sup>           | 5.40±1.26 <sup>b</sup>          | 6.82±1.24 <sup>b</sup>          |
| 5                                | 3-Cyclohexen-1-ol,4-methyl-1-(1-methylethyl)-,(1R)- | 13.85±0.95 <sup>a</sup>                        | 10.41±1.19 <sup>b</sup>           | 7.91±1.33 <sup>c</sup>           | 6.76±0.33 <sup>d</sup>          | 9.57±1.53 <sup>c</sup>          |
| 6                                | 1-Nonanol                                           | 13.22±0.96 <sup>a</sup>                        | 7.83±0.93 <sup>b</sup>            | 4.94±0.20 <sup>c</sup>           | 6.07±0.40 <sup>c</sup>          | 8.88±0.42 <sup>b</sup>          |
| 7                                | Benzyl alcohol                                      | 52.20±0.62 <sup>a</sup>                        | 29.18±8.91 <sup>bc</sup>          | 24.51±6.15 <sup>cd</sup>         | 17.98±2.71 <sup>d</sup>         | 38.47±5.62 <sup>b</sup>         |
| 8                                | Phenethyl alcohol                                   | 1723.28±18.87 <sup>a</sup>                     | 1287.43±140.16 <sup>b</sup>       | 964.09±62.72 <sup>c</sup>        | 738.10±90.19 <sup>d</sup>       | 1295.80±3.56 <sup>b</sup>       |
| 9                                | 3-Phenyl-1-propanol                                 | 10.01±0.53 <sup>a</sup>                        | 0.00±0.00                         | 0.00±0.00                        | 0.00±0.00                       | 8.22±1.84 <sup>b</sup>          |
| 10                               | Cedrol                                              | 4.78±0.72 <sup>b</sup>                         | 6.39±1.40 <sup>a</sup>            | 2.20±0.24 <sup>c</sup>           | 1.62±0.09 <sup>c</sup>          | 2.12±0.08 <sup>c</sup>          |
| 11                               | 1-Hexadecanol                                       | 5.57±1.90 <sup>a</sup>                         | 3.02±0.90 <sup>b</sup>            | 0.00±0.00                        | 1.36±0.19 <sup>bc</sup>         | 2.89±0.03 <sup>b</sup>          |
|                                  | <b>Total</b>                                        | <b>2189.27±46.98<sup>a</sup></b>               | <b>1611.94±151.72<sup>b</sup></b> | <b>1164.96±73.85<sup>c</sup></b> | <b>930.39±96.20<sup>d</sup></b> | <b>1632.40±4.66<sup>b</sup></b> |
| <b>Aldehydes&amp;Ketones (5)</b> |                                                     |                                                |                                   |                                  |                                 |                                 |
| 12                               | 5,9-Undecadien-2-one,6,10-dimethyl-,(E)-            | 14.77±3.14 <sup>a</sup>                        | 9.83±1.38 <sup>b</sup>            | 13.56±3.56 <sup>ab</sup>         | 4.81±0.75 <sup>c</sup>          | 9.88±1.76 <sup>b</sup>          |
| 13                               | Decanal                                             | 12.59±2.17 <sup>b</sup>                        | 16.69±1.24 <sup>ab</sup>          | 11.89±2.51 <sup>b</sup>          | 14.86±2.86 <sup>ab</sup>        | 18.58±3.41 <sup>a</sup>         |
| 14                               | Phenylacetaldehyde                                  | 6.19±0.85 <sup>a</sup>                         | 4.35±0.67 <sup>b</sup>            | 4.10±0.29 <sup>bc</sup>          | 3.35±0.02 <sup>c</sup>          | 5.38±0.27 <sup>a</sup>          |
| 15                               | Benzaldehyde                                        | 0.02±0.00 <sup>a</sup>                         | 0.00±0.00                         | 0.00±0.00                        | 0.00±0.00                       | 0.00±0.00                       |
| 16                               | 3,4-dimethyl-benzaldehyde                           | 8.43±2.20 <sup>d</sup>                         | 33.99±3.08 <sup>a</sup>           | 19.32±4.71 <sup>c</sup>          | 29.53±1.85 <sup>ab</sup>        | 27.57±0.41 <sup>b</sup>         |
|                                  | <b>Total</b>                                        | <b>41.98±1.96</b>                              | <b>64.87±2.34</b>                 | <b>48.86±10.72</b>               | <b>52.56±5.16</b>               | <b>61.41±1.56</b>               |
| <b>Acids (9)</b>                 |                                                     |                                                |                                   |                                  |                                 |                                 |

|    |                                               |                                 |                                 |                                 |                                |                                |
|----|-----------------------------------------------|---------------------------------|---------------------------------|---------------------------------|--------------------------------|--------------------------------|
| 17 | Acetic acid                                   | 50.96±3.93 <sup>a</sup>         | 36.86±1.62 <sup>b</sup>         | 26.39±3.38 <sup>c</sup>         | 25.49±4.64 <sup>e</sup>        | 36.00±0.04 <sup>b</sup>        |
| 18 | Butyric Acid                                  | 7.79±0.63 <sup>a</sup>          | 5.99±0.81 <sup>b</sup>          | 4.54±0.68 <sup>c</sup>          | 3.18±0.02 <sup>d</sup>         | 6.13±0.34 <sup>b</sup>         |
| 19 | Hexanoic acid                                 | 45.73±4.15 <sup>a</sup>         | 27.23±5.52 <sup>b</sup>         | 17.47±5.59 <sup>c</sup>         | 12.69±0.99 <sup>e</sup>        | 29.48±0.21 <sup>b</sup>        |
| 20 | Octanoic acid                                 | 47.20±5.09 <sup>a</sup>         | 30.73±5.70 <sup>b</sup>         | 20.45±2.51 <sup>c</sup>         | 13.75±1.76 <sup>e</sup>        | 33.83±1.70 <sup>b</sup>        |
| 21 | Nonanoic acid                                 | 24.33±3.75 <sup>a</sup>         | 15.07±6.74 <sup>bc</sup>        | 8.56±1.13 <sup>cd</sup>         | 6.95±2.28 <sup>d</sup>         | 18.15±1.68 <sup>ab</sup>       |
| 22 | Decanoic acid                                 | 27.55±3.79 <sup>a</sup>         | 10.57±1.72 <sup>bc</sup>        | 8.76±2.01 <sup>c</sup>          | 0.00±0.00                      | 13.04±0.59 <sup>b</sup>        |
| 23 | Lauric acid                                   | 30.91±5.11 <sup>a</sup>         | 12.56±3.55 <sup>b</sup>         | 10.88±2.88 <sup>bc</sup>        | 5.59±1.94 <sup>c</sup>         | 12.39±1.03 <sup>b</sup>        |
| 24 | Myristic acid                                 | 17.79±5.15 <sup>a</sup>         | 5.93±1.12 <sup>b</sup>          | 5.60±1.62 <sup>b</sup>          | 3.25±0.71 <sup>b</sup>         | 1.74±0.15 <sup>b</sup>         |
| 25 | Propanoic acid,2-methyl-,                     | 26.67±2.65 <sup>ab</sup>        | 33.08±6.60 <sup>a</sup>         | 32.07±5.64 <sup>a</sup>         | 20.06±1.32 <sup>b</sup>        | 32.09±0.23 <sup>a</sup>        |
|    | <b>Total</b>                                  | <b>278.93±19.04<sup>a</sup></b> | <b>178.02±28.92<sup>b</sup></b> | <b>134.71±22.89<sup>c</sup></b> | <b>90.94±11.13<sup>d</sup></b> | <b>182.85±4.90<sup>b</sup></b> |
|    | <b>Esters (30)</b>                            |                                 |                                 |                                 |                                |                                |
| 26 | Ethyl Hexanoate                               | 12.46±0.84 <sup>a</sup>         | 3.04±0.55 <sup>b</sup>          | 3.27±0.48 <sup>b</sup>          | 3.31±1.08 <sup>b</sup>         | 2.78±0.54 <sup>b</sup>         |
| 27 | Ethyl Lactate                                 | 67.81±2.87 <sup>a</sup>         | 46.94±3.16 <sup>b</sup>         | 32.00±9.46 <sup>c</sup>         | 29.11±3.14 <sup>e</sup>        | 50.71±2.21 <sup>b</sup>        |
| 28 | Formic acid hexyl formate                     | 17.52±0.97 <sup>a</sup>         | 0.00±0.00                       | 7.14±1.85 <sup>b</sup>          | 0.00±0.00                      | 0.00±0.00                      |
| 29 | Ethyl caprylate                               | 30.60±1.56 <sup>a</sup>         | 0.00±0.00                       | 7.17±1.34 <sup>b</sup>          | 5.55±0.61 <sup>b</sup>         | 0.00±0.00                      |
| 30 | Pentanoic acid,2-hydroxy-4-methyl,ethyl ester | 42.00±5.90 <sup>a</sup>         | 31.76±1.73 <sup>b</sup>         | 20.26±2.83 <sup>c</sup>         | 17.42±2.40 <sup>e</sup>        | 27.74±4.71 <sup>b</sup>        |
| 31 | Methoxyacetic acid,3-methylbutyl ester        | 22.85±1.60 <sup>a</sup>         | 16.71±1.45 <sup>b</sup>         | 10.50±3.00 <sup>c</sup>         | 10.28±1.31 <sup>c</sup>        | 15.27±3.08 <sup>b</sup>        |
| 32 | Benzoic acid,methyl ester                     | 4.18±0.10 <sup>a</sup>          | 0.00±0.00                       | 0.00±0.00                       | 0.00±0.00 <sup>b</sup>         | 2.06±0.46 <sup>b</sup>         |
| 33 | Decanoic acid,ethyl ester                     | 4.21±0.96 <sup>a</sup>          | 0.00±0.00                       | 1.76±0.20 <sup>b</sup>          | 0.00±0.00                      | 0.00±0.00                      |
| 34 | Butanedioic acid 1-ethyl 4-methyl ester       | 5.09±0.97 <sup>ab</sup>         | 5.60±0.93 <sup>a</sup>          | 6.45±0.54 <sup>a</sup>          | 3.54±0.21 <sup>b</sup>         | 5.19±1.30 <sup>b</sup>         |
| 35 | Benzoate acid,ethyl ester                     | 32.61±1.80 <sup>a</sup>         | 10.92±1.11 <sup>b</sup>         | 5.64±0.76 <sup>c</sup>          | 9.15±0.10 <sup>b</sup>         | 12.11±3.07 <sup>b</sup>        |
| 36 | Acetic acid ,phenylmethyl ester               | 2.80±0.34 <sup>a</sup>          | 0.00±0.00                       | 0.66±0.32 <sup>b</sup>          | 0.70±0.10 <sup>b</sup>         | 2.43±1.04 <sup>a</sup>         |
| 37 | Benzoic acid,2-hydroxy-,methyl ester          | 36.67±1.50 <sup>a</sup>         | 0.00±0.00                       | 0.00±0.00                       | 18.66±0.67 <sup>c</sup>        | 23.24±0.33 <sup>b</sup>        |
| 38 | Pentanedioic acid,diethyl ester               | 8.90±0.25 <sup>a</sup>          | 5.36±1.21 <sup>b</sup>          | 3.34±0.43 <sup>cd</sup>         | 2.96±0.42 <sup>d</sup>         | 5.08±1.85 <sup>bc</sup>        |
| 39 | Butanedioic acid diethyl ester                | 864.02±186.40 <sup>a</sup>      | 685.68±99.76 <sup>a</sup>       | 487.60±14.38 <sup>b</sup>       | 396.93±42.62 <sup>b</sup>      | 776.24±29.85 <sup>a</sup>      |
| 40 | Benzeneacetic acid,ethyl ester                | 4.25±0.92 <sup>a</sup>          | 2.92±0.34 <sup>b</sup>          | 0.00±0.00                       | 2.78±1.30 <sup>b</sup>         | 2.06±0.06 <sup>b</sup>         |

|    |                                            |                                   |                                   |                                   |                                   |                                  |
|----|--------------------------------------------|-----------------------------------|-----------------------------------|-----------------------------------|-----------------------------------|----------------------------------|
| 41 | Acetic acid,2-phenylethyl ester            | 87.16±3.35 <sup>a</sup>           | 46.38±5.77 <sup>b</sup>           | 36.07±5.41 <sup>c</sup>           | 34.22±1.15 <sup>c</sup>           | 52.95±1.87 <sup>b</sup>          |
| 42 | Dodecanoic acid,ethyl ester                | 2.95±0.66 <sup>a</sup>            | 0.00±0.00                         | 1.66±0.04 <sup>b</sup>            | 0.00±0.00                         | 0.00±0.00                        |
| 43 | Benzenepropanoic acid,ethyl ester          | 52.20±0.62 <sup>a</sup>           | 22.94±1.53 <sup>b</sup>           | 16.34±4.10 <sup>c</sup>           | 17.80±1.38 <sup>c</sup>           | 27.50±3.61 <sup>b</sup>          |
| 44 | 2 (3H)-Furanone,dihydro-5-pentyl-          | 6.92±0.30 <sup>a</sup>            | 4.37±1.55 <sup>bc</sup>           | 0.00±0.00                         | 2.96±0.07 <sup>c</sup>            | 4.72±0.87 <sup>b</sup>           |
| 45 | Tetradecanoic acid,ethyl ester             | 8.32±1.55 <sup>a</sup>            | 1.54±0.29 <sup>b</sup>            | 2.23±0.47 <sup>b</sup>            | 1.00±0.21 <sup>b</sup>            | 1.08±0.14 <sup>b</sup>           |
| 46 | Hexanedioic acid,bis(2-methylpropyl) ester | 12.87±1.47 <sup>a</sup>           | 7.75±2.07 <sup>bc</sup>           | 8.77±1.79 <sup>b</sup>            | 5.93±0.31 <sup>c</sup>            | 8.88±0.75 <sup>b</sup>           |
| 47 | 2-Propenoic acid,3-phenyl-,ethyl ester     | 0.27±0.01 <sup>a</sup>            | 0.00±0.00                         | 0.00±0.00                         | 0.00±0.00                         | 0.00±0.00                        |
| 48 | Pentanedioic acid,dibuty ester             | 3.80±0.59 <sup>a</sup>            | 3.12±1.04 <sup>ab</sup>           | 2.18±0.31 <sup>b</sup>            | 3.52±0.13 <sup>a</sup>            | 3.52±0.13 <sup>a</sup>           |
| 49 | Palmitic acid ethyl ester                  | 164.08±26.36 <sup>a</sup>         | 39.78±8.12 <sup>b</sup>           | 40.73±7.20 <sup>b</sup>           | 25.83±4.06 <sup>b</sup>           | 35.93±0.77 <sup>b</sup>          |
| 50 | Heptadecanoic acid,15-methyl-,ethyl ester  | 14.09±1.93 <sup>a</sup>           | 15.15±3.53 <sup>a</sup>           | 12.54±2.23 <sup>ab</sup>          | 8.88±0.69 <sup>b</sup>            | 11.97±1.17 <sup>ab</sup>         |
| 51 | 9,12-Octadecadienoic acid,ethyl ester      | 53.73±6.40 <sup>b</sup>           | 78.68±7.78 <sup>a</sup>           | 2.18±0.31 <sup>c</sup>            | 0.00±0.00                         | 0.00±0.00                        |
| 52 | Ethyl linolenate                           | 4.23±0.38 <sup>b</sup>            | 6.11±0.75 <sup>a</sup>            | 0.00±0.00                         | 0.00±0.00                         | 0.00±0.00                        |
| 53 | 9-Octadecenoic acid (Z)-, ethyl ester      | 0.04±0.00 <sup>a</sup>            | 0.00±0.00                         | 0.00±0.00                         | 0.00±0.00                         | 0.01±0.00 <sup>b</sup>           |
| 54 | Tetradecanoic acid 1-methylethyl ester     | 0.00±0.00                         | 0.00±0.00                         | 5.25±0.89 <sup>a</sup>            | 0.00±0.00                         | 0.00±0.00                        |
| 55 | Methyl palmitate                           | 0.00±0.00                         | 0.00±0.00                         | 0.00±0.00                         | 7.20±0.31 <sup>a</sup>            | 0.00±0.00                        |
|    | <b>Total</b>                               | <b>1566.58±173.98<sup>a</sup></b> | <b>1034.75±137.85<sup>b</sup></b> | <b>713.73±32.88<sup>c</sup></b>   | <b>607.72±50.88<sup>c</sup></b>   | <b>1071.48±40.60<sup>b</sup></b> |
|    | <b>Phenols (4)</b>                         |                                   |                                   |                                   |                                   |                                  |
| 56 | Phenol,4-methyl                            | 5.96±0.23 <sup>a</sup>            | 5.09±1.74 <sup>ab</sup>           | 4.25±0.29 <sup>bc</sup>           | 2.87±0.54 <sup>c</sup>            | 5.33±0.15 <sup>b</sup>           |
| 57 | Eugenol                                    | 329.26±19.64 <sup>a</sup>         | 162.41±49.33 <sup>c</sup>         | 128.79±13.84 <sup>cd</sup>        | 96.82±14.80 <sup>d</sup>          | 213.80±9.50 <sup>b</sup>         |
| 58 | Carvacrol                                  | 7.26±0.51 <sup>a</sup>            | 3.72±1.03 <sup>bc</sup>           | 2.82±0.39 <sup>cd</sup>           | 2.37±0.30 <sup>d</sup>            | 4.72±0.18 <sup>b</sup>           |
| 59 | Phenol,2-methoxyl-4-(1-propenyl)-          | 8.24±0.72 <sup>a</sup>            | 4.80±1.44 <sup>b</sup>            | 0.00±0.00                         | 2.53±0.15 <sup>c</sup>            | 5.45±0.22 <sup>b</sup>           |
|    | <b>Total</b>                               | <b>350.72±20.37<sup>a</sup></b>   | <b>176.02±53.44<sup>c</sup></b>   | <b>135.86±14.52<sup>cd</sup></b>  | <b>104.59±15.63<sup>a</sup></b>   | <b>229.31±9.72<sup>d</sup></b>   |
| □  | <b>TOTAL</b>                               | <b>4412.71±148.04<sup>a</sup></b> | <b>3055.76±347.03<sup>b</sup></b> | <b>2184.56±142.35<sup>c</sup></b> | <b>1781.39±177.55<sup>d</sup></b> | <b>3167.57±52.91<sup>b</sup></b> |

Note: mean values in the same row with different superscripted letters indicate that they are significantly different at  $p < 0.05$ . ANOVA analysis was applied.
